# Supplementary material
Source: Springer Nature journal article supplement (https://www.springermedizin.de/resource/supplementary/12957_2011_936_MOESM1_ESM.pdf/9565814)

## ABDOMINOPELVIC REGIONS 0-12

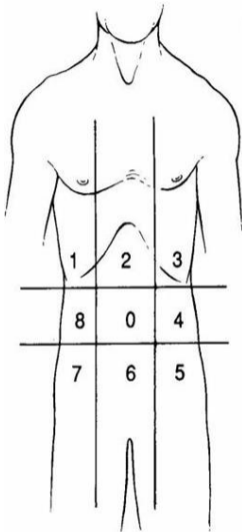

- 0: Central
- 1: Right upper
- 2: Epigastrium
- 3: Left upper
- 4: Left flank
- 5: Left lower
- 6: Pelvis
- 7: Right lower
- 8: Right flank
  
- 9: Upper jejunum
- 10: Lower jejunum
- 11: Upper ileum
- 12: Lower ileum

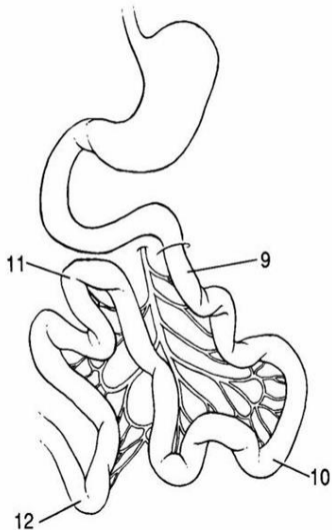

Supplement: MOESM1 [file 9565814]
